# Supplementary material
Source: PubMed Central journal article supplement (PMC2707108)

# Supplementary Figure 1

## A

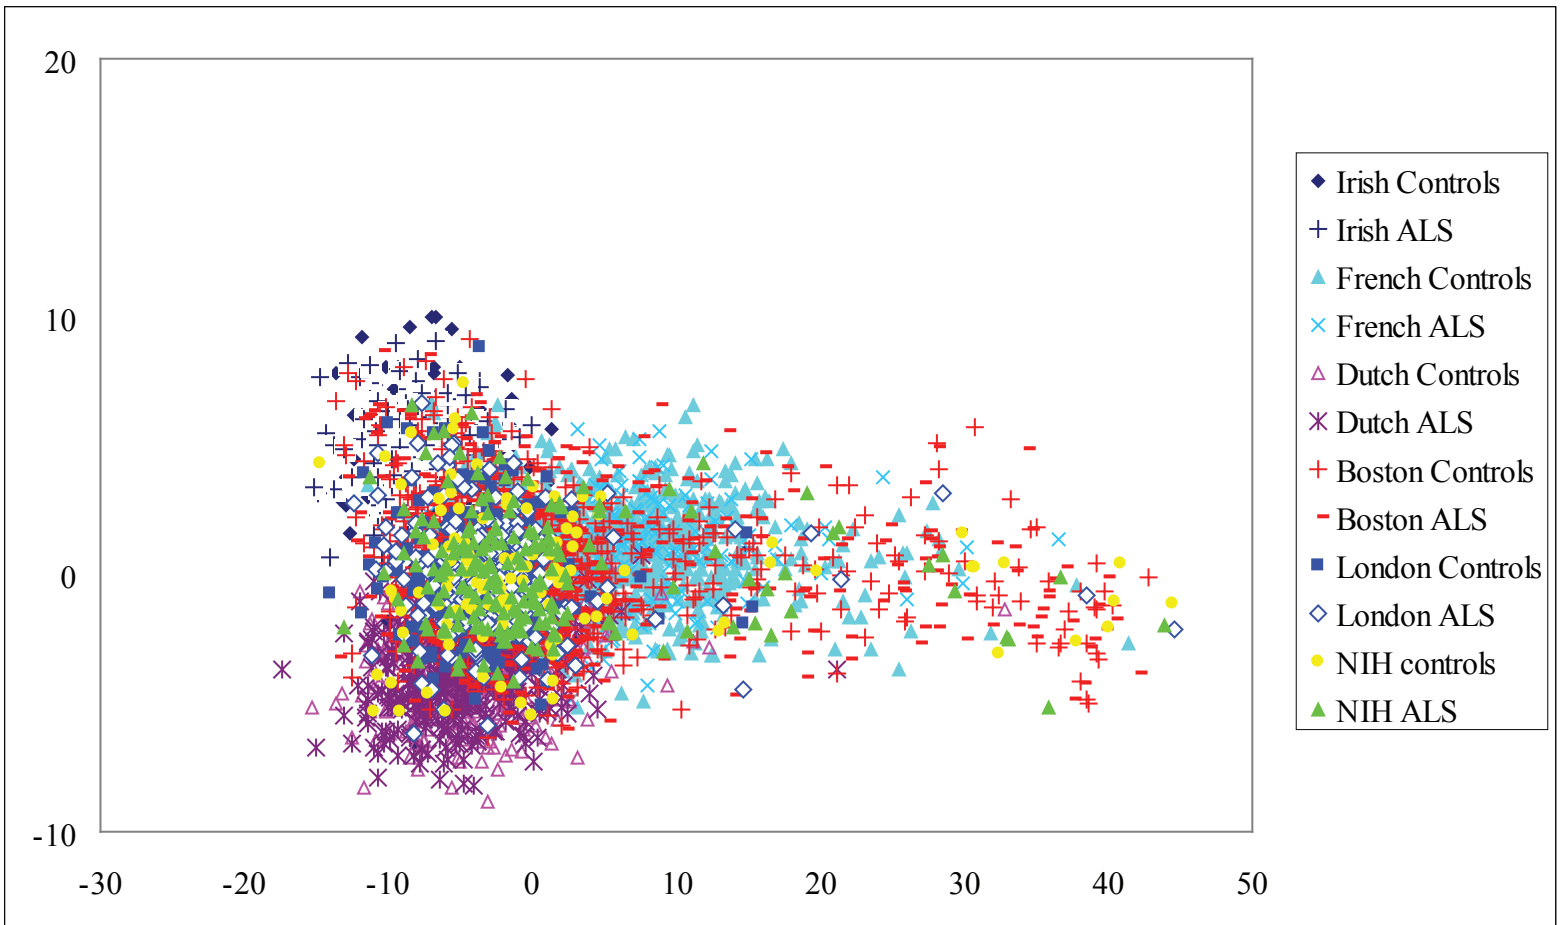

## B

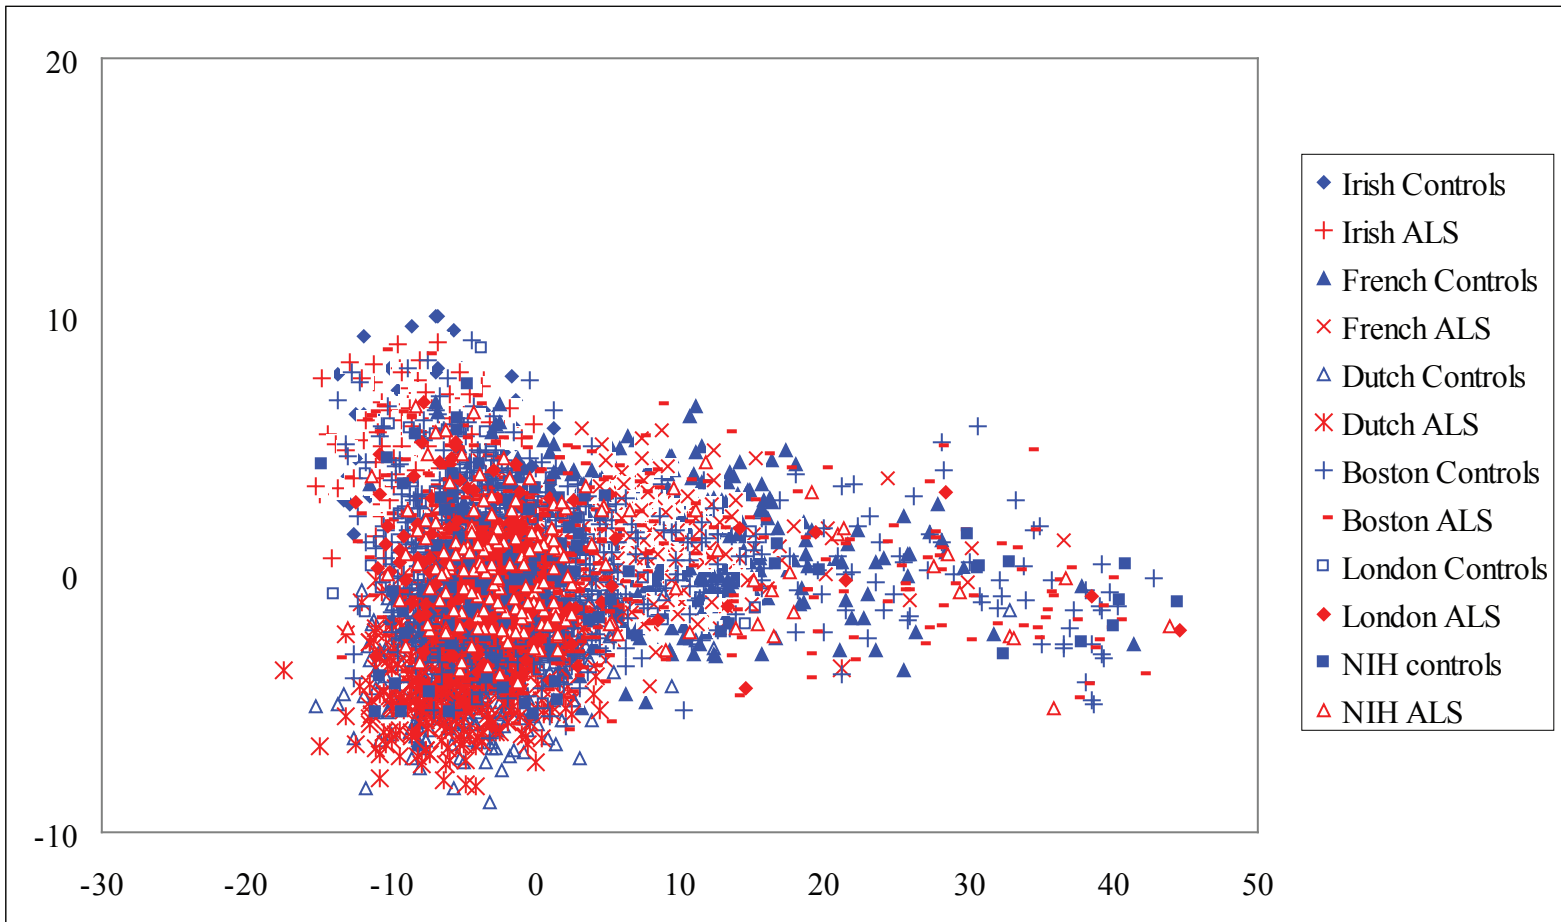

Supplement: WNL.0b013e3181a18674_1.pdf [file WNL.0b013e3181a18674_1.pdf]

# Supplementary Figure 2

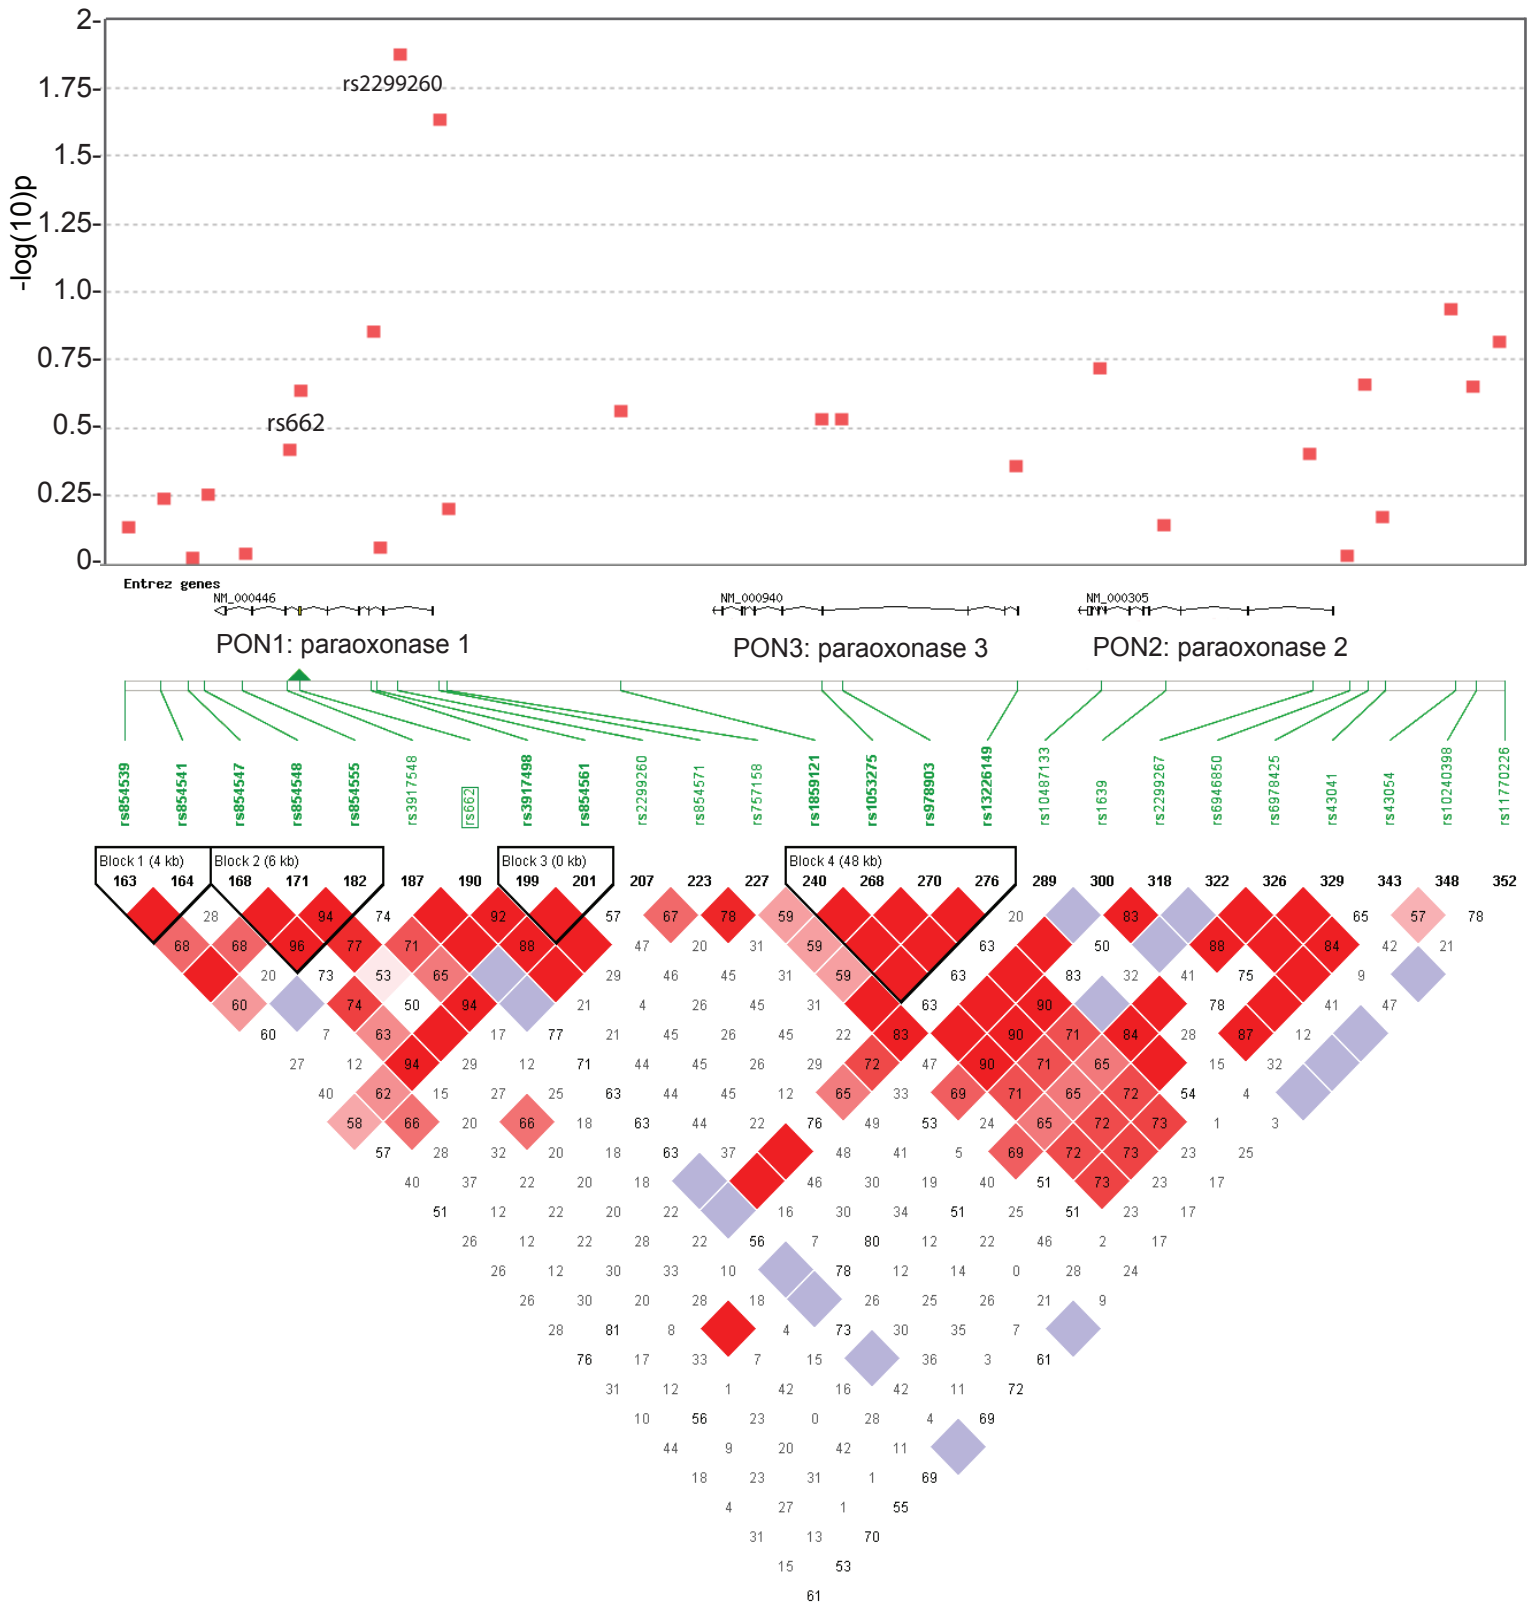

Supplement: WNL.0b013e3181a18674_2.pdf [file WNL.0b013e3181a18674_2.pdf]
